# Supplementary material for: Epithelial-to-mesenchymal transition is a resistance mechanism to sequential MET-TKI treatment of MET-amplified EGFR-TKI resistant non-small cell lung cancer cells
Source: PubMed Central journal article supplement — Transl Lung Cancer Res. 2020 Oct;9(5):1904–14. doi: 10.21037/tlcr-20-522 (PMC7653150; doi:10.21037/tlcr-20-522), 2020-10
Supplement: tlcr-09-05-1904-rc.pdf [file tlcr-09-05-1904-rc.pdf]

## **Materials Design Analysis Reporting (MDAR) Checklist for Authors**

The MDAR framework establishes a minimum set of requirements in transparent reporting applicable to studies in the life sciences (see Statement of Task: [doi:10.31222/osf.io/9sm4x](https://doi.org/10.31222/osf.io/9sm4x)). The MDAR checklist is a tool for authors, editors and others seeking to adopt the MDAR framework for transparent reporting in manuscripts and other outputs. Please refer to the MDAR Elaboration Document for additional context for the MDAR framework.

**Materials**

|                                                                                                                                                                                                         |                                                                  |            |
|---------------------------------------------------------------------------------------------------------------------------------------------------------------------------------------------------------|------------------------------------------------------------------|------------|
| <b>Antibodies</b>                                                                                                                                                                                       | <b>Yes (indicate where provided: page no/section/legend)</b>     | <b>n/a</b> |
| For commercial reagents, provide supplier name, catalogue number and RRID, if available.                                                                                                                | Information on antibodies can be found in Supplementary Table S2 |            |
| <b>Cell materials</b>                                                                                                                                                                                   | <b>Yes (indicate where provided: page no/section/legend)</b>     | <b>n/a</b> |
| <b>Cell lines:</b> Provide species information, strain. Provide accession number in repository <b>OR</b> supplier name, catalog number, clone number, <b>OR</b> RRID                                    | Method section: Cell culture and reagents, p.5, line 97          |            |
| <b>Primary cultures:</b> Provide species, strain, sex of origin, genetic modification status.                                                                                                           | Not primary cell cultures                                        | n/a        |
| <b>Experimental animals</b>                                                                                                                                                                             | <b>Yes (indicate where provided: page no/section/legend)</b>     | <b>n/a</b> |
| <b>Laboratory animals:</b> Provide species, strain, sex, age, genetic modification status. Provide accession number in repository <b>OR</b> supplier name, catalog number, clone number, <b>OR</b> RRID | No animals were used in this paper                               | n/a        |
| <b>Animal observed in or captured from the field:</b> Provide species, sex and age where possible                                                                                                       |                                                                  | n/a        |
| <b>Model organisms:</b> Provide Accession number in repository (where relevant) <b>OR</b> RRID                                                                                                          |                                                                  | n/a        |
| <b>Plants and microbes</b>                                                                                                                                                                              | <b>Yes (indicate where provided: page no/section/legend)</b>     | <b>n/a</b> |
| <b>Plants:</b> provide species and strain, unique accession number if available, and source (including location for collected wild specimens)                                                           | No plants or microbes were used in this paper                    | n/a        |
| <b>Microbes:</b> provide species and strain, unique accession number if available, and source                                                                                                           |                                                                  | n/a        |
| <b>Human research participants</b>                                                                                                                                                                      | <b>Yes (indicate where provided: page no/section/legend)</b>     | <b>n/a</b> |
| Identify authority granting ethics approval (IRB or equivalent committee(s), provide reference number for approval.                                                                                     | No human research participants were included in this paper       | n/a        |
| Provide statement confirming informed consent obtained from study participants.                                                                                                                         |                                                                  | n/a        |
| Report on age and sex for all study participants.                                                                                                                                                       |                                                                  | n/a        |

**Design**

|                                                                                                                                                                     |                                                                                                         |            |
|---------------------------------------------------------------------------------------------------------------------------------------------------------------------|---------------------------------------------------------------------------------------------------------|------------|
| <b>Study protocol</b>                                                                                                                                               | <b>Yes (indicate where provided: page no/section/legend)</b>                                            | <b>n/a</b> |
| For clinical trials, provide the trial registration number <b>OR</b> cite DOI in manuscript.                                                                        | Not a clinical trial                                                                                    | n/a        |
| <b>Laboratory protocol</b>                                                                                                                                          | <b>Yes (indicate where provided: page no/section/legend)</b>                                            | <b>n/a</b> |
| Provide DOI or other citation details if detailed step-by-step protocols are available.                                                                             | Protocols from the manufacturers are cited by name of the product and the company in the Method section |            |
| <b>Experimental study design (statistics details)</b>                                                                                                               | <b>Yes (indicate where provided: page no/section/legend)</b>                                            | <b>n/a</b> |
| State whether and how the following have been done, <b>or</b> if they were not carried out.                                                                         | The following was not carried out as we do not find it applicable in our study design                   |            |
| Sample size determination                                                                                                                                           |                                                                                                         | n/a        |
| Randomisation                                                                                                                                                       |                                                                                                         | n/a        |
| Blinding                                                                                                                                                            |                                                                                                         | n/a        |
| Inclusion/exclusion criteria                                                                                                                                        |                                                                                                         | n/a        |
| <b>Sample definition and in-laboratory replication</b>                                                                                                              | <b>Yes (indicate where provided: page no/section/legend)</b>                                            | <b>n/a</b> |
| State number of times the experiment was replicated in laboratory                                                                                                   | Listed in each section of analyses described in the method section, p.4-8                               |            |
| Define whether data describe technical or biological replicates                                                                                                     | Defined in the method section, p.4-8                                                                    |            |
| <b>Ethics</b>                                                                                                                                                       | <b>Yes (indicate where provided: page no/section/legend)</b>                                            | <b>n/a</b> |
| Studies involving human participants: State details of authority granting ethics approval (IRB or equivalent committee(s), provide reference number for approval.   | No human participants were involved                                                                     | n/a        |
| Studies involving experimental animals: State details of authority granting ethics approval (IRB or equivalent committee(s), provide reference number for approval. | No experimental animals were involved                                                                   | n/a        |
| Studies involving specimen and field samples: State if relevant permits obtained, provide details of authority approving study; if none were required, explain why. | No specimen or field samples were involved                                                              | n/a        |
| <b>Dual Use Research of Concern (DURC)</b>                                                                                                                          | <b>Yes (indicate where provided: page no/section/legend)</b>                                            | <b>n/a</b> |
| If study is subject to dual use research of concern, state the authority granting approval and reference number for the regulatory approval                         | Not subject to dual use research of concern                                                             | n/a        |

**Analysis**

|                                                                                                                                               |                                                              |            |
|-----------------------------------------------------------------------------------------------------------------------------------------------|--------------------------------------------------------------|------------|
| <b>Attrition</b>                                                                                                                              | <b>Yes (indicate where provided: page no/section/legend)</b> | <b>n/a</b> |
| State if sample or data point from the analysis is excluded, and whether the criteria for exclusion were determined and specified in advance. | No data points were excluded from the analysis               | n/a        |
| <b>Statistics</b>                                                                                                                             | <b>Yes (indicate where provided: page no/section/legend)</b> | <b>n/a</b> |
| Describe statistical tests used and justify choice of tests.                                                                                  | Method section: Statistics and graphs, p. 8, line 185        |            |
| <b>Data Availability</b>                                                                                                                      | <b>Yes (indicate where provided: page no/section/legend)</b> | <b>n/a</b> |
| State whether newly created datasets are available, including protocols for access or restriction on access.                                  | No newly created datasets are available                      | n/a        |
| If data are publicly available, provide accession number in repository or DOI or URL.                                                         | All data are presented in the paper                          | n/a        |
| If publicly available data are reused, provide accession number in repository or DOI or URL, where possible.                                  | All data are presented in the paper                          | n/a        |
| <b>Code Availability</b>                                                                                                                      | <b>Yes (indicate where provided: page no/section/legend)</b> | <b>n/a</b> |
| For all newly generated code and software essential for replicating the main findings of the study:                                           | No newly generated code or software were used                |            |
| State whether the code or software is available.                                                                                              |                                                              | n/a        |
| If code is publicly available, provide accession number in repository, or DOI or URL.                                                         |                                                              | n/a        |

**Reporting**

|                                                                                                                                                                                                                                          |                                                              |            |
|------------------------------------------------------------------------------------------------------------------------------------------------------------------------------------------------------------------------------------------|--------------------------------------------------------------|------------|
| <b>Adherence to community standards</b>                                                                                                                                                                                                  | <b>Yes (indicate where provided: page no/section/legend)</b> | <b>n/a</b> |
| MDAR framework recommends adoption of discipline-specific guidelines, established and endorsed through community initiatives. Journals have their own policy about requiring specific guidelines and recommendations to complement MDAR. |                                                              |            |
| State if relevant guidelines (eg., ICMJE, MIBBI, ARRIVE) have been followed, and whether a checklist (eg., CONSORT, PRISMA, ARRIVE) is provided with the manuscript.                                                                     | No specific guidelines were followed                         | n/a        |

Article Information: <http://dx.doi.org/10.21037/tlcr-20-522>
